# Supplementary material for: Quantitative proteomic analysis identifies proteins and pathways related to neuronal development in differentiated SH-SY5Y neuroblastoma cells
Source: PubMed Central journal article supplement — EuPA Open Proteom. 2017 Jun 23;16:1–11. doi: 10.1016/j.euprot.2017.06.001 (PMC5965715; doi:10.1016/j.euprot.2017.06.001), 2017-06-23
Supplement: mmc1.pdf [file mmc1.pdf]

## Supporting Information

### Quantitative proteomic analysis identifies proteins and pathways related to neuronal development in differentiated SH-SY5Y neuroblastoma cells.

Authors:

Jimmy Rodriguez Murillo<sup>a</sup>, Livia Goto-Silva<sup>b</sup>, Aniel Sánchez<sup>c,d</sup>, Fábio C. S. Nogueira<sup>a</sup>, Gilberto B. Domont<sup>a</sup> and Magno Junqueira<sup>a</sup>.

<sup>a</sup>Proteomics Unit, Chemistry Institute, Federal University of Rio de Janeiro, 21941-909, Rio de Janeiro, Brazil.

<sup>b</sup>D'Or Institute for Research and Education (IDOR), 22281-100, Rio de Janeiro, Brazil.

<sup>c</sup>Section for Clinical Chemistry, Department of Translational Medicine, Lund University, Skåne University Hospital Malmö, 205 02 Malmö, Sweden.

<sup>d</sup>Center of Excellence in Biological and Medical Mass Spectrometry, Biomedical Center D13, Lund University, 221 84 Lund, Sweden.

Corresponding author: Magno Junqueira

[magnojunqueira@iq.ufrj.br](mailto:magnojunqueira@iq.ufrj.br)

Proteomics Unit, Chemistry Institute, Federal University of Rio de Janeiro, Av. Athos da Silveira Ramos 149, 21941-909, Bl. A, Lab 543, Rio de Janeiro, Brazil.  
Tel. +55 (21) 2562-8862

**Table S1**

| SI      | Description                                                                                                                                                                                                                                                                                                                                                                                                                                                                                                                              | Page |
|---------|------------------------------------------------------------------------------------------------------------------------------------------------------------------------------------------------------------------------------------------------------------------------------------------------------------------------------------------------------------------------------------------------------------------------------------------------------------------------------------------------------------------------------------------|------|
| Fig. S1 | Fig S1. MS/MS spectra of peptides belonging neuronal differentiation markers NES and TUBB3. (A) MS/MS spectrum of peptide SLEEEGQELPQSADVQR belonging to NES, a zoom of low m/z region is shown, as expected, signals for diff-SH-SY5Y (115 and 117) are less intense than signals from undiff-SH-SY5Y. (B) MS/MS spectrum of peptide LATPTYGDLNHLVSATMSGVTTSLR belonging to TUBB3, a zoom of low m/z region is shown, as expected, reporter ions signals are similar reflecting no significant variation of peptide between conditions. | S3   |
| Fig. S2 | Gene Ontology (GO) analysis (cellular component terms) of the upregulated proteins from total proteome (without phosphopeptide enrichment) data set. Only terms with <i>p</i> values less than 0.01 are shown.                                                                                                                                                                                                                                                                                                                           | S4   |
| Fig. S3 | GO analysis (cellular component terms) of the downregulated proteins from total proteome (without phosphopeptide enrichment) data set. Only terms with <i>p</i> values less than 0.01 are shown.                                                                                                                                                                                                                                                                                                                                         | S4   |
| Fig. S4 | Figure S-4. GO analysis of the upregulated proteins from phosphopeptide enrichment data set. (A) Biological process. (B) Cellular component. Only terms with <i>p</i> values less than 0.01 are shown.                                                                                                                                                                                                                                                                                                                                   | S5   |
| Fig. S5 | GO analysis of the downregulated proteins from phosphopeptide enrichment data set. (A) Biological process. (B) Cellular component. Only terms with <i>p</i> values less than 0.01 are shown.                                                                                                                                                                                                                                                                                                                                             | S6   |
| Fig. S6 | KEGG pathways enrichment analysis of regulated proteins in interactive network. (A) Signaling pathways enrichment. (B) Pathways enrichment of processes related to neuron phenotype. Only terms with <i>p</i> values less than 0.01 are shown. Number of proteins involved in each pathway are indicated in parenthesis.                                                                                                                                                                                                                 | S7   |

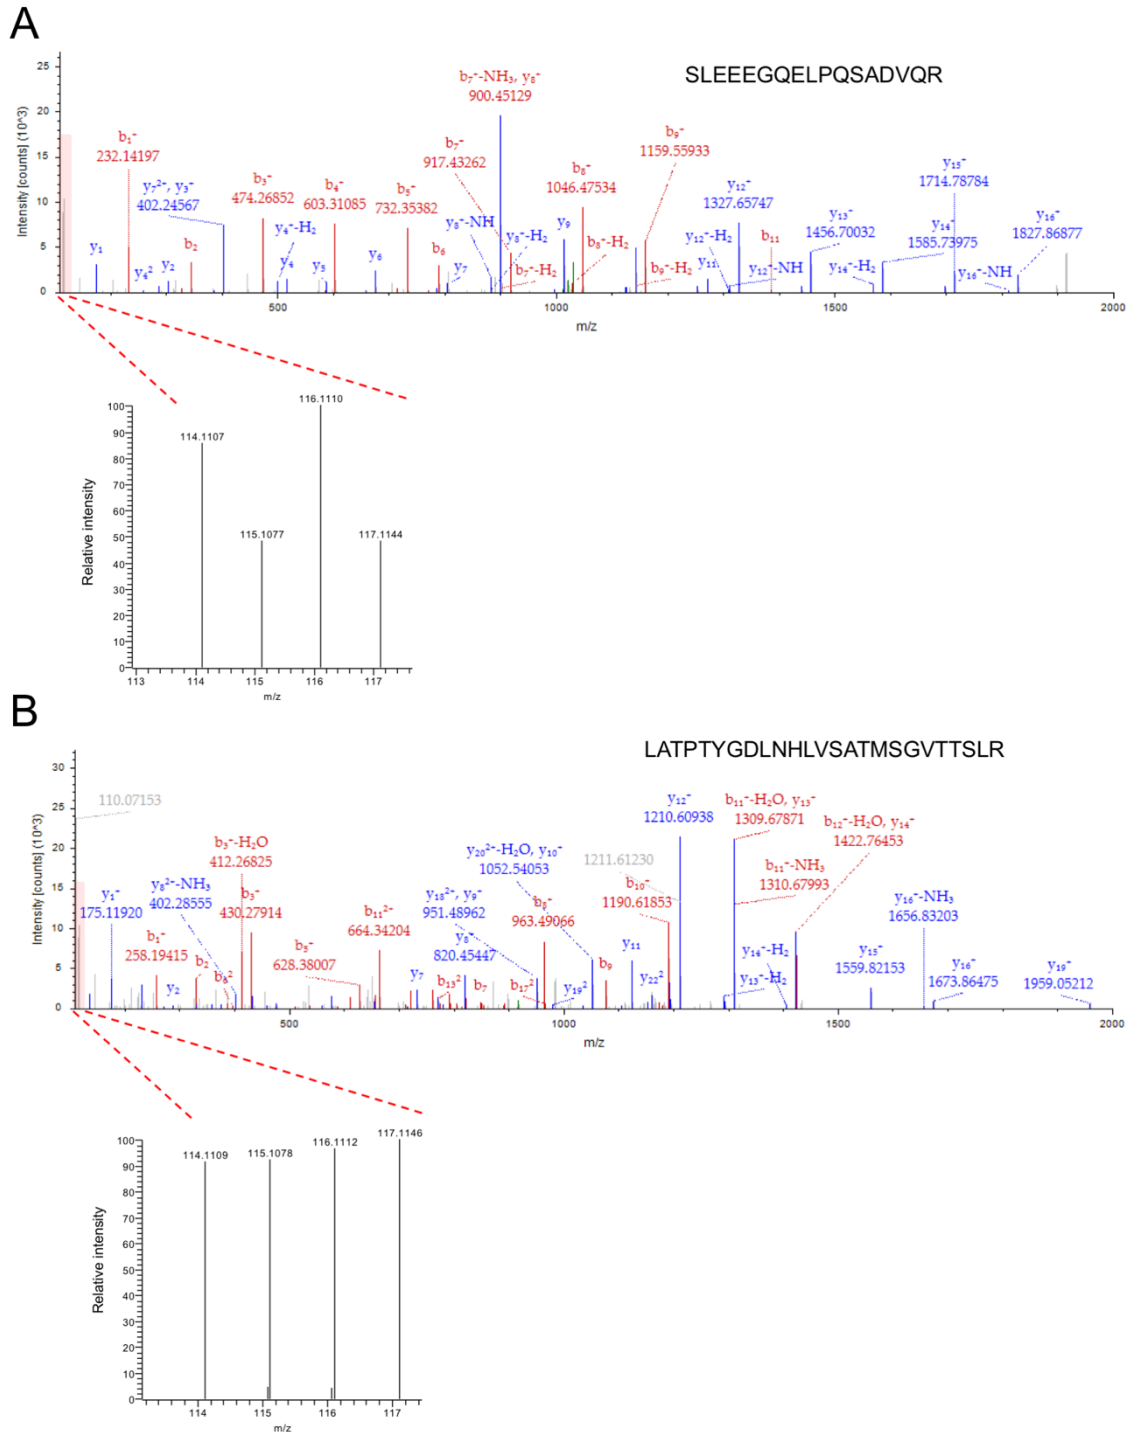

Fig S1. MS/MS spectra of peptides belonging neuronal differentiation markers NES and TUBB3. (A) MS/MS spectrum of peptide SLEEEGQELPQSADVQR belonging to NES, a zoom of low m/z region is shown, as expected, signals for diff-SH-SY5Y (115 and 117) are less intense than signals from undiff-SH-SY5Y. (B) MS/MS spectrum of peptide LATPTYGDLNHLVSATMSGVTTSLR belonging to TUBB3, a zoom of low m/z region is shown, as expected, reporter ions signals are similar reflecting no significant variation of peptide between conditions.

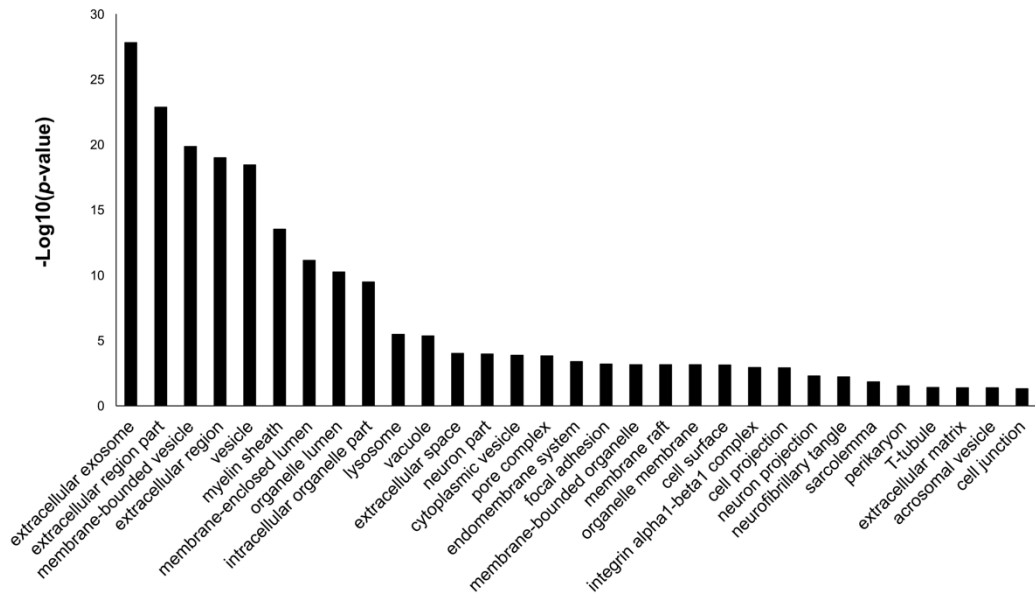

Fig. S1. Gene Ontology (GO) analysis (cellular component terms) of the upregulated proteins from total proteome (without phosphopeptide enrichment) data set. Only terms with  $p$  values less than 0.01 are shown.

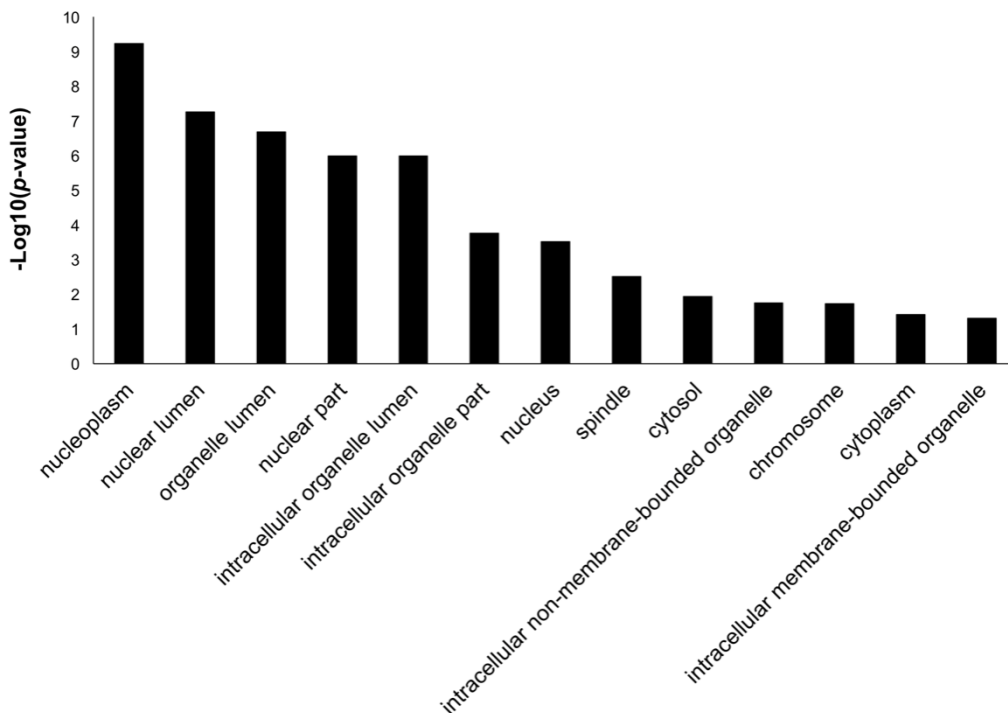

Fig. S3. GO analysis (cellular component terms) of the downregulated proteins from total proteome (without phosphopeptide enrichment) data set. Only terms with  $p$  values less than 0.01 are shown.

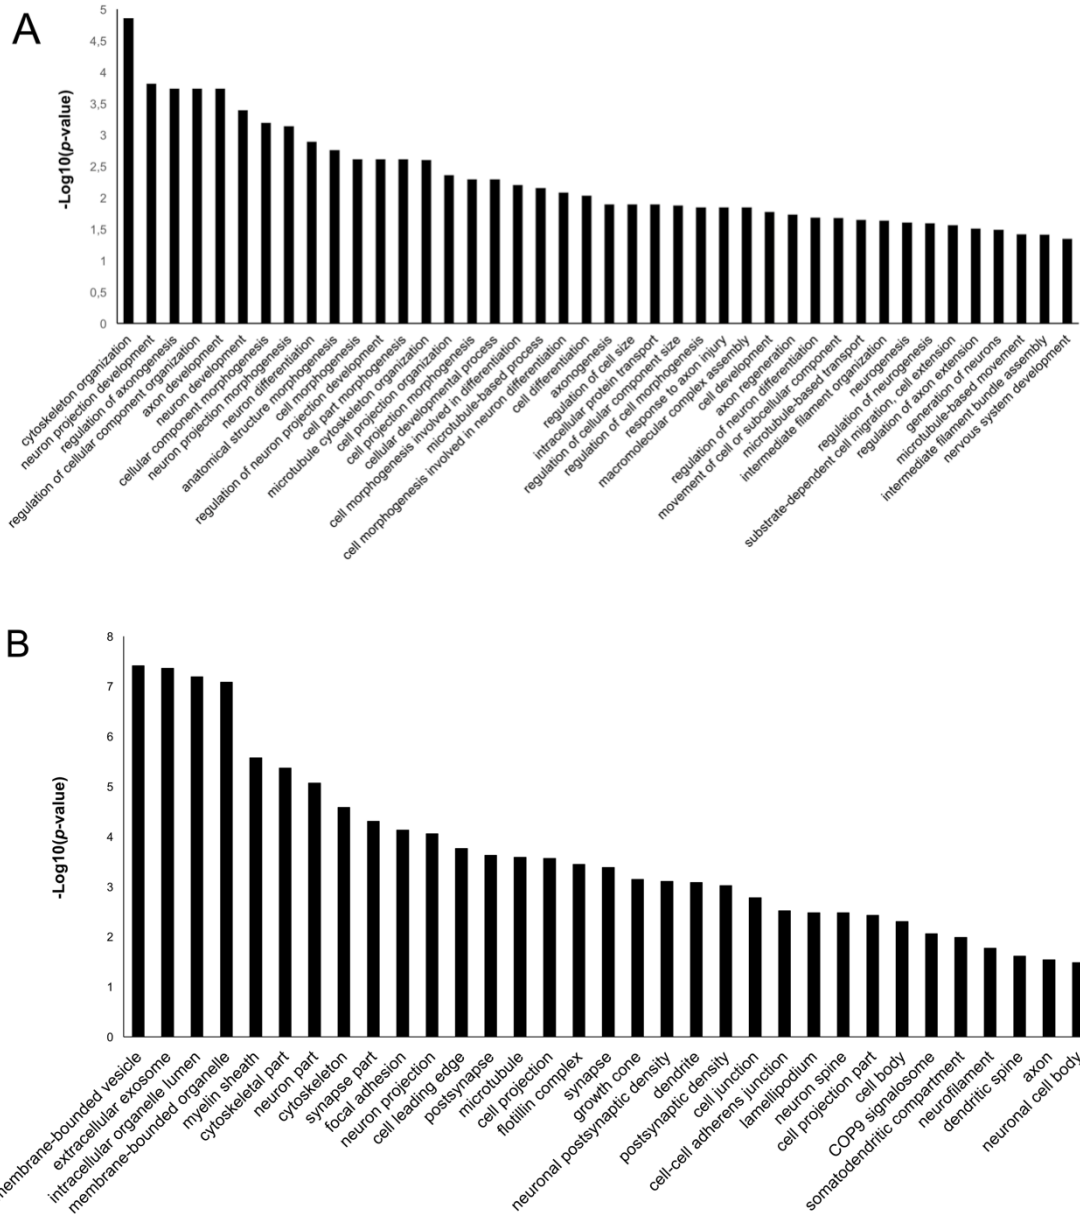

Fig. S4. GO analysis of the upregulated proteins from phosphopeptide enrichment data set. (A) Biological process. (B) Cellular component. Only terms with  $p$  values less than 0.01 are shown.

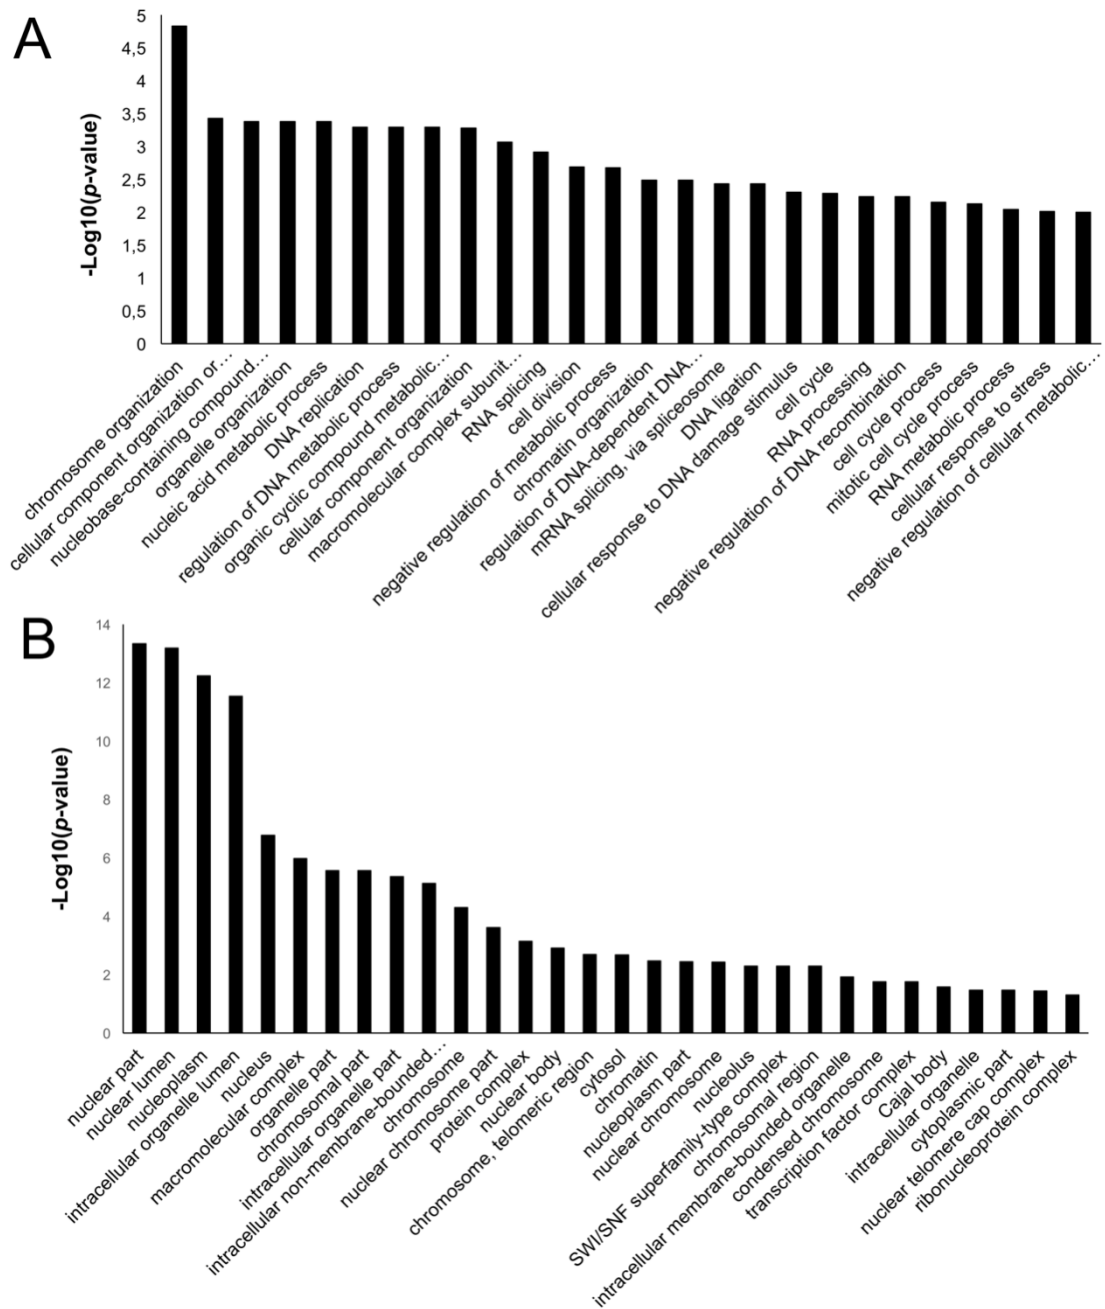

Fig. S5. GO analysis of the downregulated proteins from phosphopeptide enrichment data set. (A) Biological process. (B) Cellular component. Only terms with  $p$  values less than 0.01 are shown.

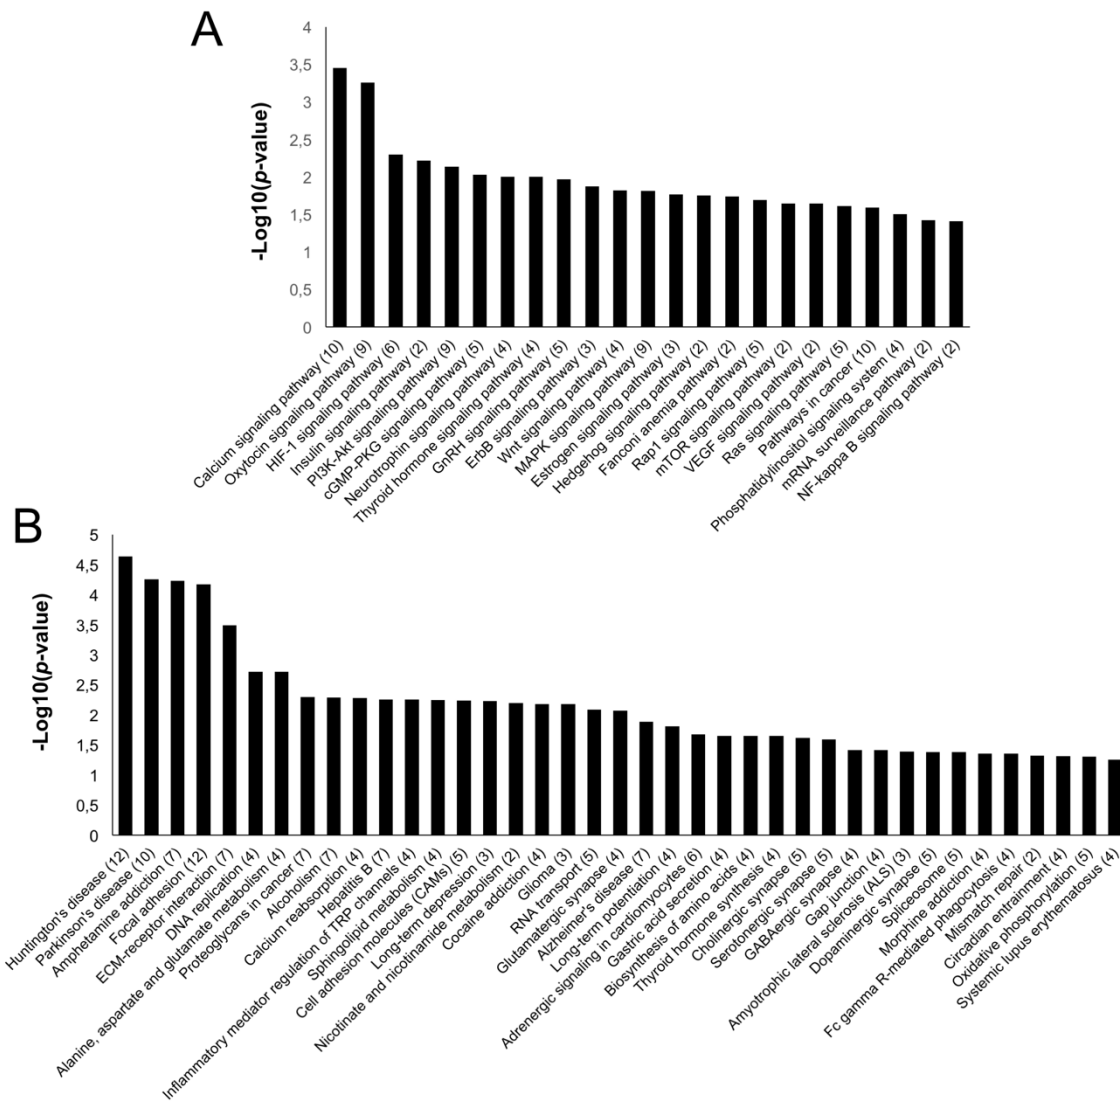

Fig. S6. KEGG pathways enrichment analysis of regulated proteins in interactive network. (A) Signaling pathways enrichment. (B) Pathways enrichment of processes related to neuron phenotype. Only terms with  $p$  values less than 0.01 are shown. Number of proteins involved in each pathway are indicated in parenthesis.
